# Supplementary material
Source: publisher site journal article supplement (https://www.dovepress.com/article/283430)
Supplement: Supplementary file 1 [file get_supplementary_file.php]

## Supplementary Material

### Effect of starvation in reversing cancer drug-resistance based on dextran nanoparticles drug-resistance detection approach

*Chenglong Wang<sup>1</sup>, Xuzhu Gao<sup>1</sup>, Fanchen Wang<sup>1</sup>, Wencai Guan<sup>1</sup>, Hongjing Dou<sup>\*2</sup>, Guoxiong Xu<sup>\*1</sup>*

<sup>1</sup> Research Center for Clinical Medicine, Jinshan Hospital, Fudan University, Shanghai 201508, P.R. China.

<sup>2</sup> The State Key Laboratory of Metal Matrix Composites, School of Materials Science and Engineering, Shanghai Jiao Tong University, Shanghai 200240, P. R. China.

\* Corresponding authors.

Guoxiong Xu, MD, PhD

Scientist, Professor of Oncology

Research Center for Clinical Medicine

Jinshan Hospital, Fudan University

1508 Longhang Road, Shanghai 201508, P.R. China

Tel: +86-21-34189990; Fax: +86-21-57039502

Email: guoxiong.xu@fudan.edu.cn

ORCID iD: 0000-0002-9074-8754

Hongjing Dou, PhD, Professor

The State Key Laboratory of Metal Matrix Composites

School of Materials Science and Engineering, Shanghai Jiao Tong University

800 Dongchuan Road, Shanghai 200240, P.R. China

Tel: +86-21-34202956; Fax: +86-21-34202745

Email: hjdou@sjtu.edu.cn

**Table S1** Sample abbreviation list.

| Abbreviation | Sample name                                        |
|--------------|----------------------------------------------------|
| GISA         | Graft copolymerization induced self-assembly       |
| FDNPs        | Fluorescent dextran nanoparticles                  |
| OV cells     | Human ovarian cancer OVCAR-3 cells                 |
| DROV cells   | Paclitaxel-resistant OVCAR-3 cells                 |
| K562         | Human immortalized myelogenous leukemia K562 cells |
| DRK562       | Doxorubicin-resistant K562 cells                   |

**Table S2** PCR Primer sequences.

| Name    | Sequence (5' → 3')    | Target position |
|---------|-----------------------|-----------------|
| MDR1    |                       |                 |
| Forward | CACATTTGGCAAAGCTGGAGA | nt 2818-2838    |
| Reverse | CATCATTTGGCGAGCCTGGTA | nt 2938-2957    |
| GAPDH   |                       |                 |
| Forward | GCACCGTCAAGGCTGAGAAC  | nt 249-268      |
| Reverse | TGGTGAAGACGCCAGTGGA   | nt 368-386      |

**DROV cell line construction.** DROV cell line was constructed by paclitaxel intervention with a gradient paclitaxel concentration from 0.01 to 70  $\mu\text{M}$ . During the intervention process, the cells were treated with paclitaxel for 24 to 48 hours and then cultured in a relatively low concentration of paclitaxel or drug-free medium to restore their growth. The paclitaxel concentration gradually increased during the intervention. The intervention lasted for about 7 months and finally obtained the DROV cell line.
